# Supplementary material for: The Trajectory of Nutritional Status and Physical Activity before and after Transcatheter Aortic Valve Implantation
Source: MDPI journal article supplement (doi:10.3390/nu14235137), 2022-12-02
Supplement: s1 [file s1]

**Table S1.** complete case analysis of nutritional status and physical activity preprocedural, at 30 days and 6 months after the procedure.

| Variable                         | Preprocedural   | 30 days         | 6 months        | Adjusted Mixed Linear Model of Change Per Month |              |          |
|----------------------------------|-----------------|-----------------|-----------------|-------------------------------------------------|--------------|----------|
|                                  |                 |                 |                 | $\beta$                                         | 95% CI       | <i>P</i> |
| Nutritional status               |                 |                 |                 |                                                 |              |          |
| MNA-SF score, median (IQR)       | 13 (12 – 14)    | 13 (12 – 14)    | 13 (12 – 14)    | 0.00                                            | -0.05 , 0.06 | 0.87     |
| Risk at malnutrition, %          | 23              | 23              | 20              | -0.39                                           | -3.27, 2.48  | 0.79     |
| Physical activity                |                 |                 |                 |                                                 |              |          |
| Steps per day , mean $\pm$ SD    | 6337 $\pm$ 3004 | 6732 $\pm$ 3034 | 6832 $\pm$ 3454 | 47                                              | -32, 125     | 0.24     |
| Low physical activity, %         | 72              | 53              | 55              | -0.10                                           | -0.23, 0.02  | 0.11     |
| Peak 30 min cadence, mean        | 66 $\pm$ 19     | 70 $\pm$ 22     | 69 $\pm$ 23     | 0.22                                            | -0.36, 0.79  | 0.45     |
| Low intensity (<70 steps/min), % | 64              | 51              | 53              | -0.05                                           | -0.18, 0.08  | 0.43     |

**Table S2.** worst case analysis of nutritional status and physical activity preprocedural, at 30 days and 6 months after the procedure.

| Variable                         | Preprocedural | 30 days      | 6 months     | Adjusted Mixed Linear Model of Change Per Month |             |      |
|----------------------------------|---------------|--------------|--------------|-------------------------------------------------|-------------|------|
|                                  |               |              |              | B                                               | 95% CI      | P    |
| Nutritional status               |               |              |              |                                                 |             |      |
| MNA-SF score, median (IQR)       | 13 (11 – 14)  | 13 (11 – 14) | 13 (11 – 14) | 0.02                                            | -0.03, 0.07 | 0.50 |
| Risk at malnutrition, %          | 27            | 34           | 35           | -0.81                                           | -3.38, 1.75 | 0.53 |
| Physical activity                |               |              |              |                                                 |             |      |
| Steps per day, mean ± SD         | 6273 ± 3007   | 5723 ± 3603  | 5756 ± 3650  | 16                                              | -47, 79     | 0.62 |
| Low physical activity, %         | 69            | 62           | 62           | -0.07                                           | -0.18, 0.03 | 0.16 |
| Peak 30 min cadence, mean        | 66 ± 20       | 61 ± 28      | 62 ± 27      | 0.02                                            | -0.41, 0.45 | 0.94 |
| Low intensity (<70 steps/min), % | 61            | 59           | 60           | -0.01                                           | -0.11, 0.09 | 0.81 |

For worst case scenario missing values due to mortality, low health status or inability to contact were imputed with the lowest score of that particular timepoint or were categorized as risk at malnutrition, low physical activity level or low intensity.

**Table S3.** Change in individual components of the mini nutritional assessment short form.

| Variable                 | Preprocedural | 30 days | 6 months | A mixed Linear Model of Change Per Month |             |          |
|--------------------------|---------------|---------|----------|------------------------------------------|-------------|----------|
|                          |               |         |          | $\beta$                                  | 95% CI      | <i>P</i> |
| Nutritional status       |               |         |          |                                          |             |          |
| Lower appetite, %        | 22            | 17      | 19       | -0.01                                    | -0.09, 0.08 | 0.86     |
| Weight loss, %           | 29            | 38      | 32       | 0.02                                     | -0.05, 0.09 | 0.64     |
| Poor mobility, %         | 5             | 5       | 6        | 0.04                                     | -0.11, 0.18 | 0.62     |
| Stress or sickness, %    | 11            | 6       | 9        | -0.01                                    | -0.13, 0.11 | 0.91     |
| Neurological problems, % | 11            | 12      | 13       | 0.00                                     | -0.12, 0.12 | 0.95     |
| Low BMI, %               | 20            | 20      | 20       | -0.02                                    | -0.31, 0.27 | 0.89     |
